# Supplementary material for: Insight into Groundwater Resources along the Coast of Benin (West Africa) through Geochemistry and Isotope Hydrology; Recommendations for Improved Management
Source: MDPI journal article supplement (doi:10.3390/w14142154), 2022-07-07
Supplement: s1 [file s1]

**Table S1.** In situ measurements, geochemical and isotopic data of surface and groundwater samples of the study area.

| ID            | Type       | X     | Y     | pH   | CE     | T     | Cl <sup>-</sup> | Na <sup>+</sup> | K <sup>+</sup> | Mg <sup>++</sup> | Ca <sup>++</sup> | Br <sup>-</sup> | NO <sub>3</sub> <sup>-</sup> | SO <sub>4</sub> <sup>--</sup> | HCO <sub>3</sub> <sup>-</sup> | Na/Cl | Br/Cl                | δ <sup>18</sup> O | δ <sup>2</sup> H |
|---------------|------------|-------|-------|------|--------|-------|-----------------|-----------------|----------------|------------------|------------------|-----------------|------------------------------|-------------------------------|-------------------------------|-------|----------------------|-------------------|------------------|
| Lower aquifer |            |       |       |      | μS/cm  | °C    | mg/L            |                 |                |                  |                  |                 |                              |                               |                               |       | (x10 <sup>-3</sup> ) | ‰                 | ‰                |
| <b>SB1</b>    | Piezometer | 2.33  | 6.4   | 4.69 | 49.40  | 31.70 | 6.77            | 4.98            | 0.41           | 0.86             | 1.65             | 0.04            | 0.18                         | 3.74                          | 10.98                         | 1.14  | 2.70                 | -3.67             | -19.62           |
| <b>FR4-1</b>  | Piezometer | 2.33  | 6.383 | 5.02 | 52.10  | 30.90 | 7.18            | 6.16            | 1.59           | 0.60             | 1.52             | 0.04            | 1.84                         | 3.87                          | 14.64                         | 1.32  | 2.80                 | -3.22             | -15.17           |
| <b>FE-1</b>   | Piezometer | 2.316 | 6.366 | 5.75 | 224.00 | 30.70 | 32.37           | 21.90           | 5.28           | 3.79             | 10.03            | 0.09            | 1.22                         | 29.54                         | 36.60                         | 1.04  | 1.20                 | -3.43             | -16.39           |
| <b>FR-9</b>   | Piezometer | 2.316 | 6.366 | 5.75 | 46.60  | 29.90 | 8.23            | 4.96            | 0.31           | 0.73             | 1.42             | 0.13            | 1.36                         | 2.46                          | 7.32                          | 0.93  | 7.10                 | -3.51             | -16.69           |
| <b>GAIN</b>   | Borehole   | 2.3   | 6.35  | 5.21 | 128.40 | 29.40 | 17.60           | 14.11           | 0.77           | 2.76             | 3.36             | 0.08            | 26.91                        | 1.35                          | 7.32                          | 1.24  | 2.10                 | -3.52             | -18.10           |
| <b>JA-154</b> | Borehole   | 2.3   | 6.366 | 5.66 | 40.30  | 29.40 | 5.08            | 4.68            | 0.10           | 0.61             | 1.00             | 0.15            | 4.29                         | 4.98                          | 3.66                          | 1.42  | 13.10                | -3.36             | -16.12           |
| <b>GAIN1</b>  | Borehole   | 2.327 | 6.389 | 4.84 | 87.80  | 28.70 | 18.04           | 10.65           | 1.31           | 1.40             | 2.31             | 0.03            | 2.20                         | 4.61                          | 7.32                          | 0.91  | 0.90                 | -3.49             | -17.12           |
| <b>GAIN2</b>  | Borehole   | 2.310 | 6.381 | 5    | 79.10  | 29.10 | 15.05           | 9.69            | 0.34           | 1.09             | 2.14             | 0.09            | 1.36                         | 4.14                          | 2.44                          | 0.99  | 2.50                 | -3.44             | -18.06           |
| <b>FA</b>     | Borehole   | 2.275 | 6.378 | 5.23 | 33.90  | 29.30 | 8.94            | 3.83            | 0.28           | 0.64             | 1.28             | 0.00            | 0.00                         | 2.62                          | 2.44                          | 0.66  | 0.00                 | -3.49             | -17.74           |
| <b>FG</b>     | Borehole   | 2.273 | 6.385 | 4.72 | 388.00 | 29.50 | 78.50           | 48.85           | 14.02          | 10.89            | 8.23             | 0.18            | 61.38                        | 12.36                         | 7.32                          | 0.96  | 1.00                 | -3.38             | -16.14           |
| <b>PzN</b>    | Piezometer | 2.272 | 6.385 | 4.56 | 38.70  | 30.20 | 5.47            | 6.27            | 0.36           | 0.66             | 1.31             | 0.00            | 3.08                         | 4.82                          | 2.44                          | 1.77  | 0.00                 | -3.40             | -17.75           |
| <b>Fag</b>    | Borehole   | 2.283 | 6.335 | 4.67 | 45.90  | 30.20 | 1.92            | 4.87            | 0.34           | 0.92             | 1.81             | 0.00            | 1.91                         | 4.58                          | 18.30                         | 3.92  | 0.00                 | -3.45             | -19.24           |
| <b>Fho</b>    | Borehole   | 2.248 | 6.384 | 4.65 | 53.00  | 29.20 | 4.99            | 6.25            | 0.30           | 0.92             | 1.93             | 0.03            | 4.31                         | 4.41                          | 7.32                          | 1.93  | 3.10                 | -3.32             | -16.37           |
| <b>GAIN3</b>  | Borehole   | 2.206 | 6.368 | 4.53 | 60.60  | 29.40 | 10.62           | 7.97            | 0.33           | 0.88             | 1.49             | 0.00            | 2.18                         | 4.26                          | 7.32                          | 1.16  | 0.00                 | -3.42             | -17.36           |
| <b>FA</b>     | Borehole   | 2.204 | 6.402 | 4.75 | 81.30  | 29.50 | 14.43           | 11.89           | 0.49           | 1.29             | 2.83             | 0.06            | 4.50                         | 2.57                          | 9.76                          | 1.27  | 1.90                 | -3.21             | -17.58           |
| <b>F6</b>     | Borehole   | 2.202 | 6.407 | 5.37 | 48.30  | 29.60 | 9.65            | 5.09            | 0.12           | 0.67             | 1.38             | 0.00            | 4.33                         | 1.25                          | 3.66                          | 0.81  | 0.00                 | -3.50             | -18.47           |
| <b>F5</b>     | Borehole   | 2.201 | 6.410 | 5.2  | 60.50  | 28.10 | 7.24            | 4.14            | 0.12           | 0.56             | 1.19             | 0.00            | 1.40                         | 1.04                          | 4.88                          | 0.88  | 0.00                 | -3.48             | -18.29           |
| <b>JO-27</b>  | Borehole   | 2.219 | 6.387 | 4.83 | 51.60  | 30.60 | 6.39            | 5.98            | 2.77           | 0.74             | 1.62             | 0.00            | 9.02                         | 3.46                          | 9.76                          | 1.45  | 0.00                 | -3.53             | -17.11           |
| <b>FT</b>     | Borehole   | 2.272 | 6.389 | 4.97 | 74.50  | 30.10 | 6.55            | 5.64            | 2.01           | 1.53             | 2.07             | 0.08            | 19.50                        | 1.40                          | 7.32                          | 1.33  | 5.20                 | -3.32             | -15.16           |
| <b>FD</b>     | Borehole   | 2.251 | 6.406 | 5.12 | 74.20  | 30.00 | 7.11            | 5.02            | 7.15           | 1.10             | 1.00             | 0.08            | 5.03                         | 11.41                         | 7.32                          | 1.09  | 4.80                 | -3.44             | -15.88           |
| <b>FH</b>     | Borehole   | 2.236 | 6.415 | 6.01 | 483.00 | 29.20 | 54.06           | 36.64           | 44.01          | 11.78            | 27.14            | 0.23            | 81.84                        | 35.97                         | 36.60                         | 1.05  | 1.90                 | -3.03             | -14.99           |
| <b>F11</b>    | Borehole   | 2.253 | 6.404 | 5.15 | 46.10  | 29.80 | 7.97            | 5.47            | 0.56           | 0.71             | 1.65             | 0.00            | 0.25                         | 4.64                          | 4.88                          | 1.06  | 0.00                 | -3.26             | -16.33           |
| <b>F12</b>    | Borehole   | 2.343 | 6.394 | 4.24 | 72.50  | 29.30 | 7.10            | 5.33            | 0.28           | 1.15             | 2.93             | 0.02            | 7.06                         | 11.07                         | 2.44                          | 1.16  | 1.00                 | -3.52             | -17.96           |
| <b>F13</b>    | Borehole   | 2.310 | 6.390 | 4.83 | 31.10  | 29.80 | 4.99            | 3.67            | 0.25           | 0.39             | 1.00             | 0.00            | 1.84                         | 2.61                          | 3.66                          | 1.14  | 0.00                 | -3.36             | -16.43           |
| <b>F2</b>     | Borehole   | 2.236 | 6.387 | 4.68 | 87.60  | 29.60 | 5.69            | 12.46           | 0.27           | 1.07             | 2.06             | 0.05            | 22.51                        | 4.27                          | 7.32                          | 3.38  | 4.10                 | -3.24             | -16.16           |
| <b>F5</b>     | Borehole   | 2.218 | 6.380 | 4.79 | 108.60 | 29.80 | 8.15            | 9.36            | 0.20           | 0.70             | 1.68             | 0.07            | 18.68                        | 0.56                          | 7.32                          | 1.77  | 3.70                 | -3.39             | -16.46           |

|                |            |       |       |      |        |       |       |       |      |       |       |      |        |      |        |      |      |       |        |
|----------------|------------|-------|-------|------|--------|-------|-------|-------|------|-------|-------|------|--------|------|--------|------|------|-------|--------|
| <b>F6</b>      | Borehole   | 2.222 | 6.378 | 5.24 | 81.30  | 30.10 | 7.45  | 11.10 | 0.27 | 0.74  | 2.17  | 0.03 | 21.55  | 4.05 | 4.88   | 2.30 | 1.60 | -3.29 | -15.88 |
| <b>F9</b>      | Borehole   | 2.232 | 6.359 | 5.23 | 43.20  | 30.30 | 5.33  | 3.34  | 0.71 | 0.62  | 1.19  | 0.05 | 0.00   | 1.83 | 3.66   | 0.97 | 3.80 | -3.60 | -19.44 |
| <b>F8</b>      | Borehole   | 2.186 | 6.382 | 4.36 | 42.00  | 31.20 | 5.97  | 3.45  | 0.77 | 0.64  | 1.31  | 0.05 | 0.00   | 1.32 | 3.66   | 0.89 | 3.70 | -3.45 | -18.29 |
| <b>F7</b>      | Borehole   | 2.148 | 6.391 | 4.87 | 52.20  | 30.70 | 6.91  | 4.13  | 0.76 | 0.67  | 1.34  | 0.00 | 0.00   | 4.34 | 4.88   | 0.92 | 0.00 | -3.45 | -17.63 |
| <b>FS</b>      | Borehole   | 2.137 | 6.385 | 7.07 | 286.00 | 31.70 | 29.87 | 18.15 | 1.90 | 5.55  | 45.94 | 0.13 | 0.70   | 1.62 | 176.90 | 0.94 | 2.00 | -3.28 | -16.16 |
| <b>PU1-2</b>   | Piezometer | 2.137 | 6.384 | 4.55 | 46.30  | 30.20 | 9.17  | 5.22  | 0.45 | 0.91  | 1.64  | 0.00 | 0.67   | 2.10 | 7.32   | 0.88 | 0.00 | -3.33 | -18.14 |
| <b>PU1-1</b>   | Piezometer | 2.076 | 6.372 | 4.98 | 74.20  | 31.10 | 11.45 | 5.10  | 0.39 | 0.89  | 1.57  | 0.00 | 0.00   | 3.03 | 4.88   | 0.69 | 0.00 | -3.50 | -19.65 |
| <b>SB3</b>     | Piezometer | 2.095 | 6.352 | 4.97 | 79.40  | 31.10 | 7.94  | 5.80  | 0.70 | 1.73  | 4.77  | 0.02 | 0.00   | 2.88 | 30.50  | 1.13 | 1.20 | -3.39 | -19.63 |
| <b>SB2</b>     | Piezometer | 2.087 | 6.339 | 4.97 | 63.40  | 31.00 | 8.16  | 5.79  | 0.79 | 1.53  | 3.52  | 0.00 | 0.00   | 3.64 | 12.20  | 1.10 | 0.00 | -3.89 | -18.66 |
| <b>F8</b>      | Piezometer | 2.087 | 6.322 | 4.75 | 43.10  | 30.10 | 6.26  | 4.38  | 0.28 | 0.58  | 1.66  | 0.04 | 1.74   | 2.00 | 7.32   | 1.08 | 2.70 | -3.70 | -16.22 |
| <b>PP</b>      | Piezometer | 2.087 | 6.323 | 6.25 | 336.00 | 32.10 | 17.05 | 40.86 | 4.53 | 7.80  | 32.70 | 0.08 | 0.00   | 1.78 | 170.80 | 3.70 | 2.20 | -3.93 | -18.90 |
| <b>JO-40</b>   | Borehole   | 2.049 | 6.336 | 4.18 | 71.40  | 29.20 | 7.87  | 4.71  | 0.33 | 1.43  | 2.65  | 0.11 | 11.78  | 3.29 | 4.88   | 0.92 | 6.20 | -3.41 | -17.73 |
| <b>PB-7684</b> | Borehole   | 2.006 | 6.339 | 4.32 | 48.30  | 29.20 | 8.33  | 4.58  | 0.34 | 0.69  | 1.47  | 0.00 | 0.54   | 3.01 | 3.66   | 0.85 | 0.00 | -3.39 | -17.08 |
| <b>PB-3138</b> | Borehole   | 2.028 | 6.366 | 4.8  | 51.20  | 29.90 | 6.40  | 5.47  | 0.31 | 0.65  | 1.55  | 0.00 | 8.86   | 1.48 | 3.66   | 1.32 | 0.00 | -3.27 | -16.52 |
| <b>PA-8772</b> | Borehole   | 2.028 | 6.367 | 5.49 | 59.50  | 28.60 | 9.02  | 6.36  | 0.46 | 0.89  | 2.09  | 0.06 | 2.31   | 0.34 | 9.76   | 1.09 | 3.00 | -3.05 | -16.05 |
| <b>JA-73</b>   | Borehole   | 2.002 | 6.358 | 5.3  | 44.30  | 28.50 | 5.15  | 4.11  | 0.23 | 0.45  | 1.12  | 0.05 | 0.35   | 0.54 | 4.88   | 1.18 | 0.60 | -3.06 | -16.63 |
| <b>GAIN4</b>   | Borehole   | 1.981 | 6.365 | 5.56 | 49.80  | 28.70 | 8.53  | 5.83  | 0.35 | 0.75  | 1.96  | 0.02 | 2.92   | 0.09 | 7.32   | 1.06 | 1.00 | -3.11 | -17.11 |
| <b>GAIN5</b>   | Borehole   | 1.981 | 6.366 | 5.65 | 48.30  | 28.80 | 7.78  | 5.65  | 0.31 | 0.76  | 1.97  | 0.02 | 4.19   | 0.35 | 7.32   | 1.12 | 0.00 | -3.00 | -16.51 |
| <b>AT1154</b>  | Borehole   | 1.976 | 6.388 | 5.61 | 50.80  | 29.60 | 9.09  | 5.82  | 0.25 | 0.72  | 1.84  | 0.00 | 3.04   | 0.53 | 4.88   | 0.99 | 0.00 | -3.64 | -17.83 |
| <b>GAIN6</b>   | Borehole   | 1.976 | 6.389 | 5.61 | 43.30  | 29.50 | 5.51  | 5.71  | 0.31 | 0.51  | 1.36  | 0.03 | 3.02   | 0.67 | 7.32   | 1.60 | 2.50 | -3.57 | -16.94 |
| <b>GAIN7</b>   | Borehole   | 2.993 | 6.392 | 5.82 | 43.70  | 29.50 | 6.70  | 4.75  | 0.37 | 0.73  | 1.73  | 0.06 | 3.80   | 0.24 | 4.88   | 1.09 | 3.80 | -3.67 | -17.09 |
| <b>Pz1</b>     | Piezometer | 1.976 | 6.399 | 5.61 | 142.40 | 31.20 | 7.71  | 9.44  | 2.21 | 4.70  | 11.54 | 0.14 | 0.00   | 0.00 | 69.54  | 1.89 | 8.20 | -4.64 | -25.54 |
| Upper aquifer  |            |       |       |      |        |       |       |       |      |       |       |      |        |      |        |      |      |       |        |
| <b>P16</b>     | Dug well   | 1.867 | 6.357 | 5.63 | 84.70  | 28.90 | 17.38 | 15.91 | 0.07 | 0.30  | 0.66  | 0.11 | 2.10   | 5.93 | 12.20  | 1.41 | 2.80 | -3.65 | -16.26 |
| <b>P21</b>     | Dug well   | 2.051 | 6.401 | 5.27 | 208.00 | 28.80 | 58.57 | 38.31 | 0.28 | 0.39  | 1.22  | 0.06 | 2.52   | 5.36 | 4.88   | 1.01 | 0.50 | -3.56 | -17.56 |
| <b>P22</b>     | Dug well   | 1.917 | 6.427 | 4.80 | 67.60  | 28.30 | 9.06  | 8.29  | 0.14 | 0.93  | 2.55  | 0.00 | 0.00   | 4.40 | 7.32   | 1.41 | 0.00 | -3.10 | -14.80 |
| <b>P32</b>     | Dug well   | 1.906 | 6.435 | 4.36 | 431.00 | 28.80 | 68.18 | 48.91 | 3.64 | 9.62  | 15.33 | 0.19 | 108.06 | 1.90 | 7.32   | 1.11 | 1.20 | -3.39 | -17.31 |
| <b>P41</b>     | Dug well   | 1.819 | 6.377 | 5.11 | 76.20  | 27.50 | 17.23 | 12.53 | 0.35 | 0.52  | 1.54  | 0.00 | 0.19   | 2.61 | 9.76   | 1.12 | 0.00 | -3.30 | -15.55 |
| <b>P42</b>     | Dug well   | 1.836 | 6.327 | 5.60 | 259.00 | 28.70 | 54.01 | 35.44 | 0.37 | 2.13  | 19.06 | 0.18 | 3.77   | 4.92 | 36.84  | 1.01 | 1.50 | -3.66 | -17.05 |
| <b>P44</b>     | Dug well   | 1.832 | 6.279 | 4.00 | 413.00 | 28.10 | 78.21 | 38.93 | 5.35 | 10.60 | 13.92 | 0.20 | 85.06  | 0.76 | 7.32   | 0.77 | 1.10 | -3.32 | -16.18 |

|             |            |       |         |      |          |       |         |         |       |        |        |       |        |        |        |      |      |       |        |
|-------------|------------|-------|---------|------|----------|-------|---------|---------|-------|--------|--------|-------|--------|--------|--------|------|------|-------|--------|
| <b>P45</b>  | Dug well   | 2.071 | 6.373   | 4.02 | 160.90   | 28.70 | 28.65   | 17.15   | 1.43  | 2.57   | 3.50   | 0.09  | 20.66  | 1.48   | 7.32   | 0.92 | 1.40 | -3.50 | -17.71 |
| <b>P83</b>  | Dug well   | 2.073 | 6.376   | 6.00 | 788.00   | 28.60 | 113.15  | 76.04   | 24.59 | 20.96  | 58.98  | 0.35  | 215.15 | 29.92  | 17.08  | 1.04 | 1.40 | -3.07 | -12.41 |
| <b>P91</b>  | Dug well   | 2.615 | 6.377   | 5.48 | 76.30    | 29.10 | 8.81    | 6.57    | 0.15  | 0.49   | 9.22   | 0.00  | 0.82   | 2.17   | 34.16  | 1.15 | 0.00 | -2.98 | -15.57 |
| <b>P94</b>  | Dug well   | 2.625 | 6.371   | 5.37 | 203.00   | 28.60 | 57.40   | 34.19   | 1.37  | 1.06   | 2.84   | 0.15  | 5.06   | 0.95   | 7.32   | 0.92 | 1.20 | -3.65 | -17.30 |
| <b>P95</b>  | Dug well   | 2.675 | 6.404   | 5.35 | 57.70    | 29.60 | 10.30   | 7.09    | 0.24  | 0.89   | 1.68   | 0.00  | 1.10   | 3.90   | 7.32   | 1.06 | 0.00 | -3.35 | -15.87 |
| <b>P100</b> | Dug well   | 2.663 | 6.430   | 6.48 | 180.60   | 29.30 | 37.16   | 27.07   | 0.87  | 1.93   | 13.95  | 0.10  | 18.42  | 3.89   | 19.52  | 1.12 | 1.20 | -3.30 | -15.50 |
| <b>P101</b> | Dug well   | 2.666 | 6.432   | 6.64 | 72.40    | 29.40 | 8.97    | 6.47    | 0.71  | 1.19   | 7.16   | 0.02  | 5.25   | 1.29   | 19.52  | 1.11 | 0.70 | -3.34 | -16.51 |
| <b>Pz2</b>  | Piezometer | 2.683 | 6.432   | 7.80 | 2500.00  | 30.90 | 523.12  | 365.72  | 12.60 | 60.16  | 50.93  | 1.46  | 0.00   | 194.85 | 104.92 | 1.08 | 1.20 | -3.47 | -17.48 |
| <b>F6</b>   | Dug well   | 2.692 | 6.417   | 7.69 | 658.00   | 30.80 | 122.57  | 80.16   | 5.24  | 13.26  | 43.44  | 0.47  | 94.30  | 25.49  | 85.40  | 1.01 | 1.70 | -2.79 | -12.85 |
| <b>F58</b>  | Borehole   | 2.614 | 6.522   | 5.64 | 164.40   | 30.50 | 11.23   | 5.21    | 8.80  | 7.16   | 2.19   | 0.09  | 0.82   | 3.58   | 61.00  | 0.72 | 3.70 | -3.28 | -15.85 |
| <b>GAIN</b> | Borehole   | 2.615 | 6.525   | 6.17 | 5290.00  | 29.40 | 1393.09 | 948.23  | 16.06 | 112.02 | 114.83 | 6.04  | 0.00   | 116.35 | 201.30 | 1.05 | 1.90 | -3.45 | -17.78 |
| <b>F53</b>  | Borehole   | 2.599 | 6.484   | 5.97 | 12360.00 | 29.70 | 3693.21 | 1678.31 | 46.92 | 420.22 | 803.05 | 23.31 | 0.00   | 557.55 | 414.80 | 0.70 | 2.80 | -2.86 | -16.99 |
| <b>P5</b>   | Dug well   | 2.610 | 6.503   | 7.02 | 273.00   | 28.90 | 11.23   | 9.33    | 3.50  | 4.85   | 42.29  | 0.08  | 0.00   | 32.99  | 103.70 | 1.28 | 3.00 | -2.81 | -11.88 |
| <b>P8</b>   | Dug well   | 2.606 | 6.499   | 5.17 | 419.00   | 29.60 | 40.54   | 46.06   | 14.72 | 10.86  | 17.89  | 0.14  | 41.38  | 86.16  | 48.80  | 1.75 | 1.50 | -2.89 | -13.42 |
| <b>P9</b>   | Dug well   | 2.605 | 6.494   | 5.95 | 406.00   | 27.50 | 46.08   | 46.42   | 4.34  | 4.24   | 37.98  | 0.29  | 8.41   | 17.26  | 109.80 | 1.55 | 2.80 | -2.75 | -12.06 |
| <b>P10</b>  | Dug well   | 2.596 | 6.497   | 5.57 | 464.00   | 28.70 | 54.68   | 55.88   | 16.55 | 5.56   | 19.50  | 0.15  | 130.42 | 17.55  | 31.72  | 1.58 | 1.20 | -3.13 | -13.85 |
| <b>P12</b>  | Dug well   | 2.599 | 6.500   | 6.42 | 199.20   | 28.90 | 14.11   | 20.04   | 2.42  | 0.97   | 22.34  | 0.05  | 6.08   | 13.79  | 64.66  | 2.19 | 1.60 | -2.58 | -11.35 |
| <b>P13</b>  | Dug well   | 2.602 | 6.502   | 6.31 | 162.20   | 29.60 | 7.73    | 10.62   | 6.37  | 5.29   | 11.64  | 0.10  | 39.97  | 14.41  | 29.28  | 2.12 | 5.90 | -2.79 | -12.82 |
| <b>P14</b>  | Dug well   | 2.593 | 6.379   | 6.34 | 362.00   | 28.90 | 21.32   | 19.79   | 1.22  | 1.60   | 67.33  | 0.40  | 1.08   | 16.52  | 176.90 | 1.43 | 8.40 | -3.27 | -14.17 |
| <b>P18</b>  | Dug well   | 2.593 | 385.183 | 5.76 | 133.20   | 28.20 | 14.01   | 12.68   | 1.37  | 0.47   | 14.85  | 0.11  | 1.84   | 2.81   | 36.60  | 1.40 | 3.60 | -3.43 | -16.98 |
| <b>P19</b>  | Dug well   | 2.533 | 6.399   | 5.13 | 268.00   | 28.70 | 57.15   | 44.28   | 2.12  | 0.77   | 7.73   | 0.31  | 17.11  | 9.25   | 9.76   | 1.20 | 2.40 | -2.96 | -13.75 |
| <b>P23</b>  | Dug well   | 2.343 | 6.419   | 4.67 | 714.00   | 28.10 | 70.97   | 82.39   | 12.32 | 9.09   | 43.39  | 0.07  | 192.33 | 30.00  | 12.20  | 1.79 | 0.40 | -2.59 | -12.26 |
| <b>P24</b>  | Dug well   | 2.343 | 6.419   | 4.26 | 444.00   | 28.00 | 31.18   | 27.27   | 5.01  | 2.99   | 65.40  | 0.20  | 1.71   | 65.28  | 102.85 | 1.35 | 2.80 | -1.96 | -9.61  |
| <b>P25</b>  | Dug well   | 2.349 | 6.428   | 5.60 | 317.00   | 29.10 | 30.17   | 27.93   | 3.63  | 3.26   | 31.95  | 0.11  | 59.25  | 8.97   | 36.60  | 1.43 | 1.60 | -2.71 | -11.78 |
| <b>P26</b>  | Dug well   | 2.343 | 6.410   | 4.92 | 169.50   | 28.10 | 14.60   | 16.75   | 1.27  | 1.05   | 16.84  | 0.10  | 20.15  | 4.92   | 54.90  | 1.77 | 3.10 | -2.92 | -15.09 |
| <b>P27</b>  | Dug well   | 2.337 | 6.406   | 5.82 | 566.00   | 29.20 | 68.36   | 56.12   | 36.98 | 12.03  | 31.95  | 0.35  | 15.87  | 56.06  | 109.80 | 1.27 | 2.20 | -3.16 | -15.58 |
| <b>P28</b>  | Dug well   | 2.332 | 6.413   | 4.46 | 650.00   | 28.80 | 101.02  | 47.05   | 41.60 | 23.16  | 28.89  | 0.65  | 78.18  | 57.29  | 26.84  | 0.72 | 2.90 | -2.68 | -13.30 |
| <b>P29</b>  | Dug well   | 2.632 | 6.470   | 3.41 | 135.80   | 29.80 | 17.62   | 13.22   | 5.86  | 1.33   | 7.88   | 0.07  | 16.15  | 3.59   | 14.64  | 1.16 | 1.80 | -3.22 | -16.21 |
| <b>P33</b>  | Dug well   | 2.680 | 6.477   | 4.56 | 123.30   | 28.80 | 28.11   | 19.09   | 0.16  | 1.39   | 2.21   | 0.21  | 9.18   | 2.65   | 4.88   | 1.05 | 3.40 | -3.26 | -16.19 |
| <b>P34</b>  | Dug well   | 2.672 | 6.512   | 4.78 | 254.00   | 28.40 | 27.47   | 21.59   | 17.18 | 3.25   | 9.96   | 0.10  | 66.13  | 15.17  | 7.32   | 1.21 | 1.60 | -2.45 | -9.86  |

|             |                      |       |       |      |          |       |          |          |        |         |        |       |        |         |        |      |       |       |        |
|-------------|----------------------|-------|-------|------|----------|-------|----------|----------|--------|---------|--------|-------|--------|---------|--------|------|-------|-------|--------|
| <b>P35</b>  | Dug well             | 2.658 | 6.530 | 6.27 | 496.00   | 29.00 | 41.51    | 36.36    | 28.74  | 5.48    | 42.83  | 0.13  | 1.73   | 124.41  | 24.40  | 1.35 | 1.40  | -2.59 | -12.91 |
| <b>P37</b>  | Dug well             | 2.620 | 6.467 | 7.09 | 1337.00  | 28.40 | 382.56   | 189.32   | 6.43   | 20.52   | 90.49  | 1.41  | 9.46   | 37.72   | 34.16  | 0.76 | 1.60  | -2.29 | -9.42  |
| <b>P38</b>  | Dug well             | 2.315 | 6.507 | 6.14 | 70.90    | 27.80 | 7.65     | 7.95     | 1.24   | 0.82    | 6.22   | 0.00  | 3.33   | 6.35    | 17.08  | 1.60 | 0.00  | -2.33 | -9.32  |
| <b>P39</b>  | Dug well             | 2.330 | 6.486 | 5.09 | 650.00   | 28.30 | 94.00    | 93.68    | 17.37  | 18.12   | 12.00  | 0.51  | 1.08   | 163.02  | 14.64  | 1.54 | 2.40  | -3.32 | -15.58 |
| <b>P51</b>  | Dug well             | 2.344 | 6.528 | 5.14 | 108.70   | 28.20 | 10.02    | 10.19    | 4.25   | 1.94    | 7.06   | 0.09  | 13.00  | 12.11   | 14.64  | 1.57 | 4.00  | -2.73 | -15.40 |
| <b>P54</b>  | Dug well             | 2.315 | 6.461 | 6.47 | 1101.00  | 29.10 | 162.35   | 101.45   | 97.50  | 28.46   | 58.48  | 0.69  | 80.36  | 73.78   | 292.80 | 0.96 | 1.90  | -3.45 | -16.97 |
| <b>P59</b>  | Dug well             | 2.222 | 6.489 | 6.23 | 262.00   | 30.20 | 25.92    | 20.48    | 7.19   | 3.57    | 22.46  | 1.10  | 49.22  | 22.24   | 14.64  | 1.22 | 18.90 | -2.81 | -13.96 |
| <b>P60</b>  | Dug well             | 2.189 | 6.499 | 5.55 | 168.20   | 28.90 | 6.90     | 8.01     | 4.32   | 1.91    | 24.66  | 0.08  | 1.66   | 18.74   | 91.50  | 1.79 | 4.90  | -2.87 | -14.27 |
| <b>P75</b>  | Dug well             | 2.245 | 6.444 | 5.72 | 170.80   | 28.90 | 21.46    | 14.32    | 3.73   | 2.09    | 20.21  | 0.11  | 4.89   | 5.81    | 67.10  | 1.03 | 2.20  | -3.24 | -16.09 |
| <b>P76</b>  | Dug well             | 2.006 | 6.382 | 5.55 | 588.00   | 28.00 | 175.43   | 77.02    | 1.85   | 6.05    | 25.72  | 0.51  | 4.36   | 14.22   | 21.96  | 0.68 | 1.30  | -2.56 | -11.85 |
| <b>P103</b> | Dug well             | 1.991 | 6.445 | 7.09 | 189.20   | 29.10 | 12.44    | 18.39    | 7.51   | 6.54    | 12.57  | 0.08  | 3.64   | 12.00   | 67.10  | 2.28 | 2.90  | -3.46 | -16.95 |
| <b>P106</b> | Dug well             | 1.993 | 6.464 | 7.00 | 668.00   | 28.30 | 64.61    | 78.53    | 32.88  | 5.04    | 76.54  | 0.25  | 187.20 | 67.91   | 34.16  | 1.88 | 1.70  | -2.19 | -10.11 |
| <b>P107</b> | Dug well             | 2.005 | 6.486 | 6.50 | 750.00   | 28.00 | 102.72   | 89.11    | 37.59  | 7.53    | 55.38  | 0.37  | 165.91 | 69.35   | 34.16  | 1.34 | 1.60  | -2.05 | -9.51  |
| <b>P108</b> | Dug well             | 1.940 | 6.389 | 6.50 | 597.00   | 29.60 | 61.82    | 61.61    | 26.07  | 6.92    | 54.06  | 0.23  | 160.85 | 56.28   | 25.62  | 1.54 | 1.70  | -2.81 | -14.93 |
| <b>P109</b> | Dug well             | 1.874 | 6.577 | 7.00 | 786.00   | 28.00 | 82.10    | 80.63    | 24.59  | 7.27    | 95.67  | 0.36  | 11.76  | 120.98  | 196.42 | 1.52 | 2.00  | -2.11 | -9.45  |
| <b>P110</b> | Dug well             | 1.915 | 6.467 | 7.00 | 792.00   | 28.40 | 68.54    | 75.26    | 31.22  | 9.01    | 91.25  | 0.18  | 103.83 | 89.31   | 134.60 | 1.69 | 1.20  | -2.43 | -10.86 |
| <b>P111</b> | Dug well             | 1.840 | 6.285 | 6.50 | 814.00   | 28.60 | 99.01    | 102.17   | 26.54  | 11.09   | 49.80  | 0.18  | 151.22 | 90.99   | 2.44   | 1.59 | 0.80  | -3.08 | -15.42 |
| <b>P112</b> | Dug well             | 1.843 | 6.298 | 7.00 | 867.00   | 29.00 | 71.33    | 90.09    | 36.22  | 9.65    | 84.12  | 0.30  | 183.80 | 104.91  | 34.16  | 1.95 | 1.90  | -2.74 | -13.82 |
| <b>P113</b> | Dug well             | 2.824 | 6.627 | 6.50 | 742.00   | 29.10 | 83.19    | 87.24    | 19.09  | 14.21   | 56.78  | 0.41  | 176.06 | 94.41   | 25.62  | 1.62 | 2.20  | -2.86 | -14.12 |
| <b>P114</b> | Dug well             | 2.788 | 6.632 | 6.30 | 391.00   | 30.50 | 23.31    | 20.94    | 8.18   | 3.69    | 58.90  | 0.19  | 143.96 | 29.66   | 34.16  | 1.39 | 3.70  | -3.30 | -17.64 |
| <b>P115</b> | Dug well             | 2.766 | 6.652 | 7.90 | 2630.00  | 31.20 | 560.45   | 418.03   | 15.47  | 40.97   | 86.96  | 1.21  | 0.00   | 239.98  | 35.96  | 1.15 | 1.00  | -2.45 | -10.52 |
| <b>P116</b> | Dug well             | 2.732 | 6.629 | 5.80 | 933.00   | 30.00 | 160.89   | 110.86   | 3.26   | 13.89   | 75.03  | 0.75  | 144.37 | 32.30   | 34.16  | 1.06 | 2.10  | -3.13 | -14.60 |
|             | Lake Nokoué          | 2.716 | 6.624 | 7.50 | 26300.00 | 29.70 | 8277.70  | 4958.54  | 159.09 | 618.43  | 208.20 | 31.48 | 0.00   | 1300.58 | 9.76   | 0.92 | 1.70  | 0.90  | 3.60   |
|             | Lake Nokoué          | 2.665 | 6.650 | 7.50 | 34800.00 | 30.10 | 12185.28 | 6666.08  | 208.12 | 796.81  | 263.30 | 37.46 | 0.00   | 1696.71 | 9.76   | 0.84 | 1.40  | 1.28  | 5.7    |
|             | Sea water Grand-Popo | 2.619 | 6.637 | 7.69 | 55600.00 | 28.30 | 19302.94 | 10692.76 | 360.56 | 1242.68 | 404.13 | 67.63 | 0.00   | 2556.31 | 0.00   | 0.86 | 1.60  | 0.82  | 1.60   |
|             | Rainwater IITA       | 2.601 | 6.655 | 5.20 | 21.78    |       | 1.41     | 0.82     | 0.27   | 0.39    | 1.58   | 0.00  | 0.53   | 1.11    | 4.80   |      |       |       |        |

**Table S2.** Physico-chemistry and isotopic data for monthly rainwater collected at Cotonou-IITA station in 2013.

| Month     | Rainfall amount | pH   | EC    | HCO <sub>3</sub> <sup>-</sup> | Cl <sup>-</sup> | Br <sup>-</sup> | NO <sub>3</sub> <sup>-</sup> | PO <sub>4</sub> <sup>-</sup> | SO <sub>4</sub> <sup>-</sup> | Na <sup>+</sup> | NH <sub>4</sub> <sup>+</sup> | K <sup>+</sup> | Mg <sup>2+</sup> | Ca <sup>2+</sup> | δ <sup>18</sup> O | δ <sup>2</sup> H |
|-----------|-----------------|------|-------|-------------------------------|-----------------|-----------------|------------------------------|------------------------------|------------------------------|-----------------|------------------------------|----------------|------------------|------------------|-------------------|------------------|
|           | mm              |      | μS/cm |                               |                 |                 |                              |                              | mg/L                         |                 |                              |                |                  |                  | ‰                 |                  |
| January   | 53.3            | 6.97 | 62.5  | 17                            | 2.50            | 0.02            | 2.89                         | 0.29                         | 3.32                         | 1.64            | 3.28                         | 1.97           | 0.32             | 2.75             | -1.14             | -0.01            |
| February  | 32.3            | 7.25 | 27.6  | 6                             | 1.56            | 0.01            | 1.17                         |                              | 2.29                         | 0.89            | 0.23                         | 0.50           | 0.28             | 2.46             | -3.76             | -20.01           |
| March     | 105.1           | 7.04 | 49    | 1                             | 1.75            | 0.01            | 0.96                         | 1.22                         | 2.13                         | 0.86            |                              | 0.80           | 0.29             | 1.24             | -2.18             | -4.81            |
| April     | 246.6           | 6.82 | 25.3  | 5                             | 1.35            | 0.01            | 0.78                         | 0.34                         | 1.26                         | 0.62            | 1.61                         | 0.59           | 0.09             | 0.87             | -4.12             | -19.12           |
| May       | 148.2           | 6.59 | 22.8  | 1                             | 1.40            | 0.01            | 0.60                         | 0.06                         | 1.28                         | 0.66            | 0.18                         | 0.25           | 0.11             | 0.82             | -4.29             | -19.34           |
| June      | 118.1           | 6.51 | 21.4  | 2                             | 1.87            | 0.01            | 1.27                         | 0.07                         | 1.55                         | 1.03            | 0.72                         | 0.44           | 0.15             | 0.77             | -3.10             | -13.51           |
| July      | 42.4            | 6.97 | 82.3  | 1                             | 4.41            | 0.02            | 1.94                         | 0.58                         | 3.28                         | 2.70            |                              | 1.51           | 0.42             | 1.42             | -3.09             | -13.49           |
| August    | 0.5             |      |       |                               |                 |                 |                              |                              |                              |                 |                              |                |                  |                  |                   |                  |
| September | 117.6           | 6.79 | 36.3  | 7                             | 2.76            | 0.02            | 0.90                         | 0.05                         | 1.87                         | 1.57            | 1.57                         | 0.60           | 0.28             | 1.45             | -2.89             | -12.52           |
| October   | 63.7            | 6.70 | 31.4  | 6                             | 2.02            | 0.02            | 1.28                         | 0.07                         | 1.95                         | 1.00            | 1.46                         | 0.44           | 0.20             | 1.25             | -2.16             | -6.05            |
| November  | 25.4            | 6.71 | 34.1  | 6                             | 2.23            | 0.02            | 1.13                         | 0.06                         | 1.98                         | 1.19            | 1.50                         | 0.56           | 0.22             | 1.32             | -1.98             | -4.57            |

EC: electrical conductivity
